# Supplementary material
Source: Springer Nature journal article supplement (https://www.springermedizin.de/resource/supplementary/13063_2012_1204_MOESM1_ESM.pdf/9620216)

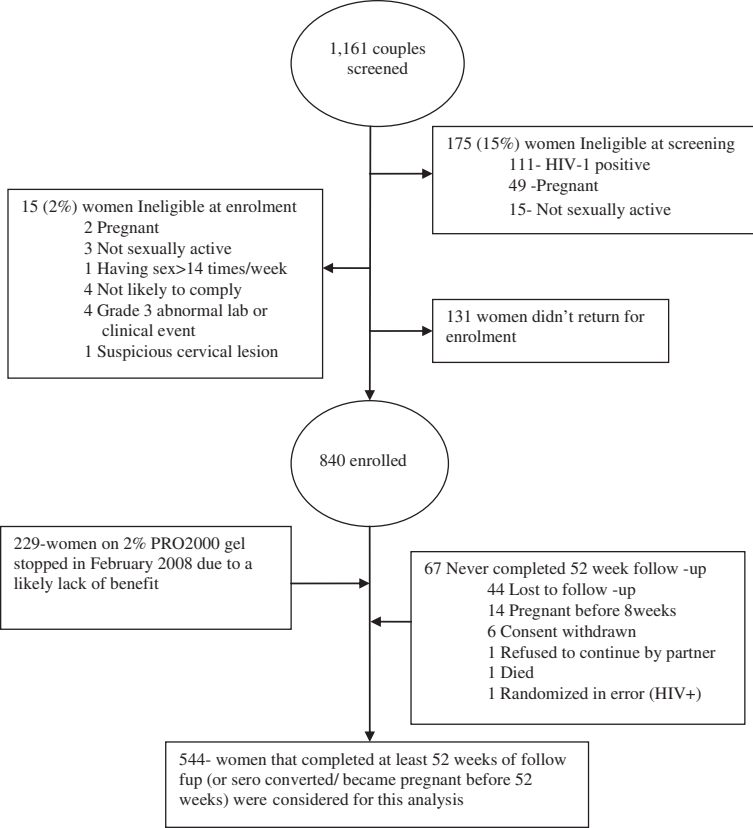

Supplement: MOESM1 [file 9620216]
